# Long-Term Metabolic and Immunological Follow-Up of Nonimmunosuppressed Patients With Type 1 Diabetes Treated With Microencapsulated Islet Allografts

Four cases

GIUSEPPE BASTA, MD<sup>1</sup>  
PIA MONTANUCCI, PHD<sup>1</sup>  
GIOVANNI LUCA, MD<sup>2</sup>  
CARLO BOSELLI, MD<sup>3</sup>  
GIUSEPPE NOYA, MD<sup>3</sup>

BARBARA BARBARO, PHD<sup>4</sup>  
MEIRIGENG QI, MD<sup>4</sup>  
KATIE P. KINZER, BS<sup>4</sup>  
JOSÉ OBERHOLZER, MD<sup>4</sup>  
RICCARDO CALAFIORE, MD<sup>1</sup>

**OBJECTIVE**—To assess long-term metabolic and immunological follow-up of microencapsulated human islet allografts in nonimmunosuppressed patients with type 1 diabetes (T1DM).

**RESEARCH DESIGN AND METHODS**—Four nonimmunosuppressed patients, with long-standing T1DM, received intraperitoneal transplant (TX) of microencapsulated human islets. Anti-major histocompatibility complex (MHC) class I–II, GAD65, and islet cell antibodies were measured before and long term after TX.

**RESULTS**—All patients turned positive for serum C-peptide response, both in basal and after stimulation, throughout 3 years of posttransplant follow-up. Daily mean blood glucose, as well as HbA<sub>1c</sub> levels, significantly improved after TX, with daily exogenous insulin consumption declining in all cases and being discontinued, just transiently, only in patient 4. Anti-MHC class I–II and GAD65 antibodies all tested negative at 3 years after TX.

**CONCLUSIONS**—The grafts did not elicit any immune response, even in the cases where more than one preparation was transplanted, as a unique finding, compatible with encapsulation-driven “bioinvisibility” of the grafted islets. This result had never been achieved with the recipient’s general immunosuppression.

*Diabetes Care* 34:2406–2409, 2011

The primary goal of this study, following our previous report (1), was to determine long-term safety of encapsulated human islet (HI) transplant (TX), upon completion of two additional cases. The following parameters were examined: 1) TX-related adverse reactions; 2) TX-directed immune destruction in nonimmunosuppressed recipients; and 3) sensitization to grafted encapsulated islet cell antigens. We also examined 1) changes in exogenous insulin consumption; 2) levels

of prior negative serum C-peptide response; 3) changes in severe nocturnal hypoglycemia, defined by blood glucose (BG) <40 mg/dL (patients 1 and 2) (2); and 4) changes in HbA<sub>1c</sub> plasma levels.

## RESEARCH DESIGN AND METHODS

### Human islet procurement

HIs were isolated from single donor pancreases, according to the Edmonton

protocol (3). Islet preparations from our laboratory were grafted in patients 1 and 2. We also used HIs procured at the University of Illinois at Chicago (UIC) (patients 3 and 4). The “UIC HIs” were isolated using a modified Ricordi’s method and passed the product release criteria including viability, purity, and endotoxin levels <5 endotoxin units/g (EU/g), as required by the U.S. Food and Drug Administration. The UIC HIs could be used in our Center because there was no suitable U.S. recipient available for such a given islet preparation. This scenario happened because the HI yield was insufficient to achieve the required 5,000 islet equivalents (IEQ)/kg body wt of listed U.S. recipients. Islet morphology, viability, and functionality assessments were performed before and after microencapsulation, showing 1) purity >80%; 2) viability >90%; and 3) stimulation index upon static incubation with glucose >5 above baseline.

### Islet microencapsulation

The selected islet batches were encapsulated in ultra-purified, endotoxin-free sodium alginate prepared in-house (patent number WO 2009/093184 A1) by our method (4).

### Patient selection

Four patients with long-standing type 1 diabetes (T1DM) were selected, as previously reported (1).

### Clinical, metabolic, and immunological evaluation

All clinical and metabolic parameters were carefully acquired before and strictly monitored after TX.

**Basal pre-TX clinical assessment.** Complete blood chemistry, including all metabolic parameters (HbA<sub>1c</sub>; daily glucose profiles after and 3 consecutive months before entering the trial), was performed.

**Post-TX assessment.** All grafted patients underwent hourly BG and exogenous insulin supplement monitoring to keep

From the <sup>1</sup>Department of Internal Medicine, Laboratory for the Study and Transplant of Pancreatic Islets, University of Perugia, Perugia, Italy; the <sup>2</sup>Department of Experimental Medicine and Biochemical Sciences, Section of Histology and Embryology, University of Perugia, Perugia, Italy; the <sup>3</sup>Department of Oncologic Surgery, University of Perugia, Perugia, Italy; and the <sup>4</sup>Division of Transplantation, University of Illinois at Chicago, Chicago, Illinois.

Corresponding author: Riccardo Calafiore, islet@unipg.it.

Received 18 April 2011 and accepted 10 August 2011.

DOI: 10.2337/dc11-0731. Clinical trial reg. no. ISRCTN43557935, www.isrctn.org.

© 2011 by the American Diabetes Association. Readers may use this article as long as the work is properly cited, the use is educational and not for profit, and the work is not altered. See <http://creativecommons.org/licenses/by-nc-nd/3.0/> for details.

**Table 1—Summary of clinical, metabolic, and immunological data of the transplanted patients throughout long-term follow-up (patients 1 and 4 received more than one graft)**

|                                            | Patient 2                          | Patient 3                          | Patient 1                           | Patient 4                            |
|--------------------------------------------|------------------------------------|------------------------------------|-------------------------------------|--------------------------------------|
| Duration of T1DM (years)                   | 20                                 | 21                                 | 25                                  | 27                                   |
| Pre-TX severe hypoglycemia (events/week)   | 1                                  | 3                                  | 4                                   | 4                                    |
| Post-TX severe hypoglycemia (events/week)  | 0                                  | 0                                  | 0                                   | 0                                    |
| Body weight at the time of transplant (kg) | 78                                 | 68                                 | 70<br>72*                           | 68<br>66†‡                           |
| Mass of islets implanted (IEQ)             | 650,000                            | 540,000                            | 400,000<br>400,000*                 | 500,000<br>500,000†<br>600,000‡      |
| Total islet mass (IEQ)                     | NA                                 | NA                                 | 800,000                             | 1,600,000                            |
| Pre-TX mean BG (mg/dL)                     | 235 ± 78                           | 180 ± 63                           | 275 ± 98                            | 247 ± 55                             |
| Post-TX mean BG (mg/dL)                    |                                    |                                    |                                     |                                      |
| 6 months                                   | 155 ± 44                           | 103 ± 34                           | 115 ± 56*                           | 145 ± 36†‡                           |
| 12 months                                  | 174 ± 54                           | 176 ± 50                           | 167 ± 58                            | 151 ± 18                             |
| 15 months                                  | 190 ± 18                           | 170 ± 63                           | 175 ± 24                            | 176 ± 12                             |
| 18 months                                  | 165 ± 44                           | 123 ± 14                           | 180 ± 36                            | 170 ± 38                             |
| 24 months                                  | 176 ± 31                           | 162 ± 15                           | 198 ± 16                            | 176 ± 26                             |
| 30 months                                  | 195 ± 06                           | Dropout                            | 241 ± 20                            | 177 ± 24                             |
| 36 months                                  | 201 ± 41                           |                                    | 208 ± 16                            | 204 ± 16                             |
| Pre-TX sCPR (ng/mL)                        | Undetectable                       | Undetectable                       | Undetectable                        | Undetectable                         |
| Post-TX sCPR (ng/mL)                       |                                    |                                    |                                     |                                      |
| 3 months                                   | Premeal = 0.25,<br>postmeal = 1.00 | Premeal = 0.63,<br>postmeal = 1.30 | Premeal = 0.20,<br>postmeal = 0.90  | Premeal = 0.57,<br>postmeal = 1.10†  |
| 6 months                                   | Premeal = 0.41,<br>postmeal = 0.85 | Premeal = 0.58,<br>postmeal = 0.91 | Premeal = 0.10,<br>postmeal = 0.42* | Premeal = 0.33,<br>postmeal = 0.81†‡ |
| 12 months                                  | Premeal = 0.35,<br>postmeal = 0.80 | Premeal = 0.40,<br>postmeal = 0.75 | Premeal = 0.25,<br>postmeal = 0.50  | Premeal = 0.35,<br>postmeal = 0.73   |
| 18 months                                  | Premeal = 0.30,<br>postmeal = 0.75 | Premeal = 0.20,<br>postmeal = 0.50 | Premeal = 0.18,<br>postmeal = 0.48  | Premeal = 0.31,<br>postmeal = 0.74   |
| 24 months                                  | Premeal = 0.18,<br>postmeal = 0.61 | Premeal = 0.10,<br>postmeal = 0.44 | Premeal = 0.26,<br>postmeal = 0.58  | Premeal = 0.35,<br>postmeal = 0.70   |
| 30 months                                  | Premeal = 0.15,<br>postmeal = 0.47 | Dropout                            | Premeal = 0.15,<br>postmeal = 0.45  | Premeal = 0.46,<br>postmeal = 0.74   |
| 36 months                                  | Premeal = 0.10,<br>postmeal = 0.51 |                                    | Premeal = 0.26,<br>postmeal = 0.55  | Premeal = 0.34,<br>postmeal = 0.76   |
| Daily exogenous insulin (IU) pre-TX        | 37                                 | 36                                 | 32                                  | 32                                   |
| Daily exogenous insulin (IU) post-TX       |                                    |                                    |                                     |                                      |
| 3 months                                   | 29                                 | 22                                 | 13                                  | 21†                                  |
| 6 months                                   | 22                                 | 20                                 | 15*                                 | 22†‡                                 |
| 12 months                                  | 22                                 | 18                                 | 15                                  | 20                                   |
| 15 months                                  | 28                                 | 20                                 | 22                                  | 20                                   |
| 18 months                                  | 28                                 | 16                                 | 22                                  | 20                                   |
| 24 months                                  | 30                                 | 18                                 | 25                                  | 26                                   |
| 27 months                                  | 30                                 | Dropout                            | 22                                  | 24                                   |
| 30 months                                  | 28                                 |                                    | 25                                  | 28                                   |
| 36 months                                  | 28                                 |                                    | 25                                  | 28                                   |
| Pre-TX GHb (%)                             | 8.7 ± 0.3                          | 8.0 ± 0.6                          | 9.0 ± 0.2                           | 9.0 ± 0.4                            |
| Post-TX GHb (%)                            |                                    |                                    |                                     |                                      |
| 3 months                                   | 7.2 ± 0.4                          | 7.2 ± 0.4                          | 7.8 ± 0.4                           | 8.1 ± 0.2†                           |
| 6 months                                   | 7.5 ± 0.3                          | 7.4 ± 0.2                          | 8.2 ± 0.3*                          | 7.2 ± 0.4†‡                          |
| 12 months                                  | 7.8 ± 0.3                          | 7.3 ± 0.3                          | 7.2 ± 0.1                           | 6.5 ± 0.3                            |
| 15 months                                  | 7.6 ± 0.2                          | 7.1 ± 0.5                          | 7.6 ± 0.4                           | 5.9 ± 0.2                            |
| 18 months                                  | 8.0 ± 0.1                          | 7.2 ± 0.1                          | 7.4 ± 0.2                           | 6.2 ± 0.4                            |
| 24 months                                  | 7.8 ± 0.3                          | 7.5 ± 0.3                          | 7.7 ± 0.4                           | 7.4 ± 0.1                            |
| 27 months                                  | 7.5 ± 0.4                          | Dropout                            | 7.2 ± 0.2                           | 7.2 ± 0.2                            |
| 30 months                                  | 7.3 ± 0.4                          |                                    | 7.7 ± 0.3                           | 6.1 ± 0.3                            |
| 36 months                                  |                                    |                                    |                                     | 7.5 ± 0.1                            |

Table 1—Continued

|                                       | Patient 2 | Patient 3     | Patient 1                                   | Patient 4       |
|---------------------------------------|-----------|---------------|---------------------------------------------|-----------------|
| Metabolic function                    |           |               |                                             |                 |
| sCPR (ng/mL), 3 months                | NA        |               | Oral glucose tolerance test BG (mg/dL)-sCPR |                 |
| 0 min                                 |           |               | 150–0.075                                   |                 |
| 30 min                                |           |               | 230–0.100                                   |                 |
| 60 min                                |           |               | 240–0.198                                   |                 |
| 90 min                                |           |               | 280–0.130                                   |                 |
| 120 min                               |           |               | 300–0.209                                   |                 |
| 180 min                               |           |               | 288–0.171                                   |                 |
| 240 min                               |           |               | 285–0.090                                   |                 |
| sCPR (ng/mL), 3 months                | NA        |               | Arginine                                    |                 |
| 0 min                                 |           |               | 0.26                                        |                 |
| 2 min                                 |           |               | 0.32                                        |                 |
| 4 min                                 |           |               | 0.30                                        |                 |
| 6 min                                 |           |               | 0.45                                        |                 |
| 8 min                                 |           |               | 0.31                                        |                 |
| 10 min                                |           |               | 0.38                                        |                 |
| sCPR (ng/mL), 3 months                | NA        | Glucagon test |                                             | Glucagon test†  |
| 0 min                                 |           | 0.047         |                                             | 0.71            |
| 5 min                                 |           | 0.017         |                                             |                 |
| 10 min                                |           | 1.090         |                                             | 0.83            |
| 15 min                                |           | 1.480         |                                             |                 |
| 30 min                                |           | 0.500         |                                             | 0.95            |
| 40 min                                |           | 0.840         |                                             | 0.82            |
| 60 min                                |           | 0.380         |                                             | 0.99            |
| 120 min                               |           | 0.470         |                                             | 0.77            |
| sCPR (ng/mL), 12 months               |           |               |                                             | Glucagon test†‡ |
| 0 min                                 |           |               |                                             | 0.18            |
| 5 min                                 |           |               |                                             | 0.59            |
| 10 min                                |           |               |                                             | 0.56            |
| 15 min                                |           |               |                                             | 0.62            |
| 20 min                                |           |               |                                             | 0.74            |
| 30 min                                |           |               |                                             | 0.71            |
| 40 min                                |           |               |                                             | 0.85            |
| 50 min                                |           |               |                                             | 0.90            |
| 60 min                                |           |               |                                             |                 |
| 120 min                               |           |               |                                             | 0.42            |
| sCPR (ng/mL), 36 months               | Dropout   | Dropout       |                                             | Glucagon test   |
| 0 min                                 |           |               |                                             | 0.30            |
| 5 min                                 |           |               |                                             | 0.42            |
| 10 min                                |           |               |                                             | 0.48            |
| 15 min                                |           |               |                                             | 0.89            |
| 20 min                                |           |               |                                             | 0.76            |
| 30 min                                |           |               |                                             | 0.74            |
| 40 min                                |           |               |                                             | 0.44            |
| 50 min                                |           |               |                                             | 0.37            |
| 60 min                                |           |               |                                             |                 |
| 120 min                               |           |               |                                             | 0.32            |
| Immune monitoring (pre-TX)            |           |               |                                             |                 |
| Anti-GAD 65 antibodies                | Negative  | Negative      | Negative                                    | Negative        |
| Islet cell antibodies                 | Negative  | Negative      | Negative                                    | Negative        |
| Class I HLA                           | Negative  | Negative      | Negative                                    | Negative        |
| Class II HLA                          | Negative  | Negative      | Negative                                    | Negative        |
| Immune monitoring (3–5 years post-TX) |           |               |                                             |                 |
| Anti-GAD 65 antibodies                | Negative  | Negative      | Negative                                    | Negative        |
| Islet cell antibodies                 | Negative  | Negative      | Negative                                    | Negative        |
| Class I HLA                           | Negative  | Negative      | Negative                                    | Negative        |
| Class II HLA                          | Negative  | Negative      | Negative                                    | Negative        |

sCPR, serum C-peptide response. Patients 2 and 3 got a single islet graft. Patient 1 got a second graft \*6 months after the first one. Patient 4 got a second graft †7 days after the first one and ‡a third graft 6 months after the first.

BG within the prefixed range (120–150 mg/dL).

**Metabolic and immunological characterization.** All patients, upon TX, underwent either an oral glucose tolerance test (75 g; patient 1 only) or a glucagon (1 mg i.v.) or arginine test (10 g in 250 mL saline i.v.; patient 1 only) to determine basal and poststimulation serum C-peptide response by radioimmunoassay (Myria, Milan, Italy). Islet cell antibodies, anti-GAD65 antibodies, and anti-major histocompatibility complex (MHC) class I–II antibodies were assessed before and after transplantation (Table 1) on a long-term follow-up basis. Anti-MHC class I–II antibodies were assessed by ELISA (Biotest, Waukesha, WI).

**Imaging.** Abdominal MRI was scheduled only if necessary, to exclude the occurrence of post-TX peritoneal lesions.

### Site of transplant and intervention procedure

All patients received a transplant of microencapsulated HIs intraperitoneally, under ecography guidance and local anesthesia. The encapsulated islet suspension in saline was placed in a 60-mL syringe barrel and slowly delivered through a polypropylene catheter into the peritoneal cavity through a small incision of the abdominal wall. The injected total graft volume did not exceed 100 mL (capsules + saline). Patient 4, on his third TX, underwent abdominal laparoscopy, under general anesthesia, to visually select and optimize the TX site and possibly avoid capsule injection errors (see patient 1). In this instance, the microcapsules were evenly distributed beneath the liver and the spleen, where blood supply is high. In all TX procedures, care was taken to dispense the capsular suspension as thoroughly as possible, to prevent formation of capsules clusters. Human islet dosing varied between recipients, ranging from 5,000 to 15,000 IEQ/kg/TX (range 540,000–1,600,000 IEQ/patient). This result strictly depended on organ availability and the islet isolation rate per pancreas.

## RESULTS

### Clinical outcome

None of the TX recipients showed any acute, significant postoperative side effects. BG levels were stable, both short and long term after TX. In particular, throughout 24 months of TX, daily mean BG was stable in all patients, whereas after

such time, the values tended to slightly but progressively raise. Interestingly, patient 1, who had suffered for severe nocturnal hypoglycemic episodes, showed evident recovery, in conjunction with stabilization of BG profiles. The natural history of this pilot study is summarized in Table 1, throughout 3 consecutive years of post-TX follow-up. At this time, the study was terminated and the patients were seen once a year. So far, at 7 years post-TX, all patients are in good health and are fully back to their original exogenous insulin therapy regimens.

### Immunological findings

As a unique finding, no anti-MHC class I–II or anti-GAD65 antibodies or islet cell antibodies were detected in any of the transplanted patients throughout 5 years of post-TX follow-up (Table 1).

### Microcapsule retrieval

Patient 1, 5 years after TX, back to his original insulin schedule, started complaining of abdominal discomfort. In our Center, upon palpation of the abdomen, we found a small mass that ultrasound scan identified as a hyperechoic cyst-like formation. The cyst, situated in the rectus anterior muscle, was surgically removed and consisted of a 3- to 4-cm fibrotic lump that contained mostly intact capsules with no more viable islet cells inside. Obviously, the original capsules, in this instance, had been mistakenly injected beneath the muscle fascia rather than intraperitoneally, thus resulting in the cyst formation.

**CONCLUSIONS**—Our alginate/polyaminoacidic encapsulation system has been confirmed to represent a powerful tool for immunoprotection of HI grafts (5), as proven by the absence of a wide array of islet cell-directed as well as anti-MHC class I–II antibodies (6). Hence, microcapsules provided the islet grafts with bioinvisibility, according to U.S. Food and Drug Administration criteria. In our opinion, this was the most important finding of the study. Obviously, the partial and transient metabolic benefits obtained by the treatment reflect limitations of this microcapsules generation, with special regard to their size in relation to TX site. Moreover, HIs can be moved through long distances with no loss of their viability and function (7). We maintain that smaller-size microcapsules could permit access to TX sites possibly associated with better functional exchange,

thereby complying, more efficiently, with metabolic requirements of patients with T1DM.

**Acknowledgments**—No potential conflicts of interest relevant to this article were reported.

G.B. and P.M. researched data, contributed to discussion, wrote the manuscript, and reviewed and edited the manuscript. G.L. contributed to discussion. C.B. and G.N. researched data. B.B. and M.Q. researched data and reviewed and edited the manuscript. K.P.K. reviewed and edited the manuscript. J.O. contributed to discussion and reviewed and edited the manuscript. R.C. contributed to discussion and wrote, reviewed, and edited the manuscript.

The authors gratefully acknowledge the technical support of the “Consorzio Interuniversitario per i Trapianti d’Organo,” Rome, Italy. They also acknowledge the technical assistance of Rita Tognellini, PhD (“Centro Regionale di Tipizzazione Tissutale ed Immunologia dei Trapianti,” Perugia University Hospital, Perugia, Italy), who assisted with the anti-MCH antibody assays.

### References

1. Calafiore R, Basta G, Luca G, et al. Microencapsulated pancreatic islet allografts into nonimmunosuppressed patients with type 1 diabetes: first two cases. *Diabetes Care* 2006;29:137–138
2. Ryan EA, Shandro T, Green K, et al. Assessment of the severity of hypoglycemia and glycemic liability in type 1 diabetic subjects undergoing islet transplantation. *Diabetes* 2004;53:955–962
3. Shapiro AM, Lakey JR, Ryan EA, et al. Islet transplantation in seven patients with type 1 diabetes mellitus using a glucocorticoid-free immunosuppressive regimen. *N Engl J Med* 2000;343:230–238
4. Thanos CG, Calafiore R, Basta G, et al. Formulating the alginate-polyornithine biocapsule for prolonged stability: evaluation of composition and manufacturing technique. *J Biomed Mater Res A* 2007;83:216–224
5. Basta G, Sarchielli P, Luca G, et al. Optimized parameters for microencapsulation of pancreatic islet cells: an in vitro study clueing on islet graft immunoprotection in type 1 diabetes mellitus. *Transpl Immunol* 2004;13:289–296
6. Vendrame F, Pileggi A, Laughlin E, et al. Recurrence of type 1 diabetes after simultaneous pancreas-kidney transplantation, despite immunosuppression, is associated with autoantibodies and pathogenic autoreactive CD4 T-cells. *Diabetes* 2010;59:947–957
7. Vaithilingam V, Barbaro B, Oberholzer J, Tuch BE. Functional capacity of human islets after long-distance shipment and encapsulation. *Pancreas* 2011;40:247–252
